# Supplementary material
Source: ML conference proceedings conference paper supplement (https://openreview.net/forum?id=T6iiOqsGOh)
Supplement: supplementary_material [file attachment]

## Sheet: User_Study - Copy
ID	Prompt 1	Prompt 2	Is Prompt 1	Is Prompt 2	Neither / Wrong	Prompts visually identical (image)	Prompts visually identical (3D)	Prompts visually identical (video)
1	a man taking a shot	a man taking a vaccine shot
2	She is dancing in the rain	He is running in the park
3	the ice cream was melted by the sun	the sun was melted by the ice cream
4	An architect designing a building that represents unity	An architect drawing a blueprint for a house
5	a sunset viewed from the beach	a sunrise viewed from the beach
6	a person standing in front of a painting	a person standing behind a painting
7	a city skyline with a bridge	a city skyline without a bridge
8	the violin was played by the musician	the musician was played by the violin
9	A phone charging on a nightstand	A phone lying next to a charger on a nightstand
10	a car parked near the entrance	a car parked far from the entrance
11	A person smiling while receiving a gift	A person disappointed by their received gift
12	a beach with seagulls	a beach without seagulls
13	A chef sautéing vegetables on the stove	A chef tasting the soup in the kitchen
14	A car driving through a tunnel	A parked car near a tunnel entrance
15	a parking lot with a few cars	a parking lot packed with cars
16	a small red ball	a large red ball
17	a flower vase on the left side of the table	a flower vase on the right side of the table
18	a watch on a wrist	to watch a wrist
19	A cat playing with a ball of yarn	A ball of yarn lying next to a cat
20	A man lifting weights at the gym	A man running on a treadmill at the gym
21	a man finished painting a room	a man is painting a room
22	A cat playing with a ball of yarn	A ball of yarn lying next to a cat
23	A person feeling blue	A person painted blue
24	A student learning about the philosophy of ethics	A student studying for a math test
25	a teacher taught a lesson	a teacher is teaching a lesson
26	A person loading the dishwasher in the kitchen	A person making a sandwich in the kitchen
27	A squirrel is gathering nuts for winter	A student is studying for an exam
28	the dog barked at the mail carrier	the mail carrier barked at the dog
29	a street with traffic lights	a street without traffic lights
30	A person changing a lightbulb in the bathroom	A person hanging a shower curtain in the bathroom
31	a box with a few chocolates	a box full of chocolates
32	a pair of glasses on a table	a pair of drinking glasses on a table
33	A cat sitting on top of a dog	A dog chasing a cat
34	a small red ball	a large red ball
35	a bright light shining in the dark	a brilliant light shining in the dark
36	the spider was scared of the human	the human was scared of the spider
37	A bowl of fruit on a kitchen counter	Fruits spread out on a kitchen counter
38	A couple tying the knot	A couple tying a knot in a rope
39	a luxurious, extravagant mansion	an opulent, lavish mansion
40	A person is washing their car	An elephant is drinking from a river
41	A girl playing with a doll	A girl reading a book
42	A man riding a horse on a trail	A man feeding a horse in a stable
43	a plane flying in the sky	a carpenter's plane in the sky
44	a tall glass of milk	a short glass of milk
45	A happy family playing in the park	A family having a heated argument in the park
46	a dinner table with candles	a dinner table without candles
47	A baker decorating a cake	A baker serving a slice of cake
48	the window was broken by the storm	the storm was broken by the window
49	A cat sitting on top of a dog	A dog chasing a cat
50	A laptop resting on a desk near a window	A window with a view of a laptop on a desk
51	People waiting in line at a bus stop	A bus stop with no people around
52	A woman applying lipstick in the bathroom mirror	A woman applying mascara in the bathroom mirror
53	A person hanging a towel on a bathroom rack	A person placing a bath mat in the bathroom
54	A person washing their hands in the kitchen sink	A person preparing a salad in the kitchen
55	a box with a few chocolates	a box full of chocolates
56	A cheerful barista serving coffee to customers	An overwhelmed barista struggling with a long line of customers
57	A person sitting on a bench with an umbrella	A person standing next to a bench holding an umbrella
58	a woman picked flowers in the garden	a woman is picking flowers in the garden
59	a bookshelf beside a window	a bookshelf in front of a window
60	A cheerful barista serving coffee to customers	An overwhelmed barista struggling with a long line of customers
61	A person with a chip on their shoulder	A person with a potato chip on their shoulder
62	A phone charging on a nightstand	A phone lying next to a charger on a nightstand
63	a girl happily playing with her dog	a girl reluctantly playing with her dog
64	a luxurious, extravagant mansion	an opulent, lavish mansion
65	A car driving through a tunnel	A parked car near a tunnel entrance
66	A person cleaning the oven in the kitchen	A person microwaving popcorn in the kitchen
67	A person sitting on a bench with an umbrella	A person standing next to a bench holding an umbrella
68	A clean sink in a restaurant	A restaurant with clean tables and a sink
69	A person arranging plates in a kitchen cupboard	A person arranging glasses in a kitchen cupboard
70	A woman putting away clean dishes in the kitchen	A woman wiping down kitchen countertops
71	a full cup of water	an empty cup of water
72	A proud artist showcasing their latest masterpiece	A frustrated artist struggling with their work
73	a busy city street with pedestrians	a busy city street without pedestrians
74	a field with a few cows	a field filled with cows
75	a movie theater with a popcorn stand	a movie theater without a popcorn stand
76	A baby giggling in their mother's arms	A baby crying in their mother's arms
77	A woman shopping for groceries at a market	A woman selling produce at a market
78	a vase with a couple of flowers	a vase with a large bouquet
79	a grocery store with shopping carts	a grocery store without shopping carts
80	a pair of glasses on a table	a pair of drinking glasses on a table
81	a dark, gloomy fores	a dark, somber forest
82	a bright light shining in the dark	a brilliant light shining in the dark
83	a person confidently giving a speech	a person nervously giving a speech
84	a mountain landscape with a lake	a mountain landscape without a lake
85	a lamp on the left side of the desk	a lamp on the right side of the des
86	A person feeling blue	A person painted blue
87	A dancer expressing their emotions through movement	A dancer practicing a specific routine
88	a city skyline with a bridge	a city skyline without a bridge
89	a wide river	a narrow river
90	a watch on a wrist	to watch a wrist
91	a fast runner crossing the finish line	a swift runner crossing the finish line
92	the robot was built by the engineer	the engineer was built by the robot
93	A lightbulb moment for an inventor	An inventor holding a glowing lightbulb
94	A cheerful dog wagging its tail	A frightened dog hiding under a table
95	A fisherman casting a line into the ocean	A surfer riding a wave in the ocean
96	a person confidently giving a speech	a person nervously giving a speech
97	a dark, gloomy fores	a dark, somber forest
98	a clean white shirt	a dirty white shirt
99	the kite was flown by the girl	the girl was flown by the kite
100	the cake was eaten by the child	the child was eaten by the cake
101	a table set for dinner	a table not set for dinner
102	A person weighing themselves in the bathroom	A person adjusting the shower temperature in the bathroom
103	A person pondering the meaning of life	A person thinking about their grocery list
104	a baby took her first steps	a baby is taking her first steps
105	a woman picked flowers in the garden	a woman is picking flowers in the garden
106	A girl with a green thumb	A girl painting her thumb green
107	A girl taking a relaxing bath with candles	A girl plucking her eyebrows in the bathroom
108	A man riding a horse on a trail	A man feeding a horse in a stable
109	A modern bathroom with a glass shower	A glass filled with water in a bathroom
110	a cat playing with a ball	a cat not playing with a ball
111	A woman feeling under the weather	A woman standing below a weather vane
112	Toilet paper rolls neatly stacked	A stack of books next to a toilet
113	the dog barked at the mail carrier	the mail carrier barked at the dog
114	A woman sewing a dress	A dress and sewing supplies on a table
115	A person meditating on the interconnectedness of all things	A person sitting quietly in their room
116	The leaves are falling from the trees	The snow is covering the ground
117	a close-up of a seal	close-up of a sealed envelope
118	a mountain landscape with a lake	a mountain landscape without a lake
119	A chef chopping vegetables on a cutting board	A cutting board with chopped vegetables
120	a train with passengers	a train without passengers
121	A man fixing a clogged toilet in the bathroom	A man taking a selfie in the bathroom
122	A girl taking a relaxing bath with candles	A girl plucking her eyebrows in the bathroom
123	a fast runner crossing the finish line	a swift runner crossing the finish line
124	a girl has planted a tree	a girl is planting a tree
125	A group of friends hiking in the mountains	A group of friends camping in the mountains
126	A chef chopping vegetables on a cutting board	A cutting board with chopped vegetables
127	a dog fetched a stick	a dog is fetching a stick
128	a spacious modern kitchen	an elegant modern kitchen
129	a bright room with sunlight	a dim room with sunlight
130	a street with traffic lights	a street without traffic lights
131	a noisy crowded street	a quiet crowded street
132	A woman applying lipstick in the bathroom mirror	A woman applying mascara in the bathroom mirror
133	a house with a red door	a house without a red door
134	A group of friends hiking in the mountains	A group of friends camping in the mountains
135	a party with a handful of guests	a party with a large crowd of guests
136	a cat chased a mouse	a cat is chasing a mouse
137	a full cup of water	an empty cup of water
138	a bookworm in a library	a book with a worm in a library
139	the ice cream was melted by the sun	the sun was melted by the ice cream
140	A chef adding a pinch of salt	A chef pinching a salt shake
141	A pizza with a slice removed	A pizza slice on a plate
142	a grocery store with shopping carts	a grocery store without shopping carts
143	an old man reminiscing about his past	an old man regretting his past
144	A philosopher contemplating the nature of reality	A person daydreaming about their vacation plans
145	a teacher taught a lesson	a teacher is teaching a lesson
146	A girl playing with a doll	A girl reading a book
147	A musician composing a song about heartbreak	A musician tuning their instrument
148	A man lifting weights at the gym	A man running on a treadmill at the gym
149	A family enjoying breakfast together in the kitchen	A family playing a board game in the kitchen
150	a dinner table with candles	a dinner table without candles
151	A woman putting away clean dishes in the kitchen	A woman wiping down kitchen countertops
152	a clean, well-organized office	a tidy, well-arranged office
153	a bicycle leaning against a wall	a bicycle hanging on a wall
154	A man brewing coffee in the kitchen	A man making tea in the kitchen
155	the robot was built by the engineer	the engineer was built by the robot
156	A mother teaching her child about kindness	A mother helping her child with homework
157	A squirrel is gathering nuts for winter	A student is studying for an exam
158	a bar of gold	a gold-colored metal bar
159	A person arranging plates in a kitchen cupboard	A person arranging glasses in a kitchen cupboard
160	A child is swinging on a swing	A fish is swimming in the water
161	the kite was flown by the girl	the girl was flown by the kite
162	A person reading a book under a tree	A book and a tree in a park
163	the bird was fed by the child	the child was fed by the bird
164	a zoo with elephants	a zoo without elephants
165	a forest with a few trees	a dense forest
166	a happy dog playing in the park	a joyful dog playing in the park
167	a birthday cake with candles	a birthday cake without candles
168	a gentle rain falling on the street	a light drizzle falling on the street
169	A person walking a dog on a leash	A dog running off-leash in a park
170	A man watering the plants in his garden	A garden filled with plants and a watering can
171	A woman painting a beautiful landscape	A beautiful landscape painting on a wall
172	a table set for dinner	a table not set for dinner
173	A woman curling her eyelashes in the bathroom	A woman filling in her eyebrows in the bathroom
174	A girl jumping rope in the backyard	A jump rope lying on the grass
175	A butterfly lands on a flower	A rocket launches into spac
176	A person plugging in a hairdryer in the bathroom	A person plugging in a curling iron in the bathroom
177	a bed with pillows at the head	a bed with pillows at the foot
178	A person meditating on the interconnectedness of all things	A person sitting quietly in their room
179	a forest with a waterfall	a forest without a waterfall
180	A man lost in his thoughts	A lost man looking for directions
181	A person playing fetch with their dog	A person walking their dog in the park
182	A dancer expressing their emotions through movement	A dancer practicing a specific routine
183	A person mopping the kitchen floor	A person storing groceries in the kitchen
184	A laptop resting on a desk near a window	A window with a view of a laptop on a desk
185	A joyful reunion of old friends	A tense meeting between old rivals
186	a parking lot with a few cars	a parking lot packed with cars
187	A student learning about the philosophy of ethics	A student studying for a math test
188	a serene mountain landscape	a treacherous mountain landscape
189	a messy room with clothes on the floo	an untidy room with clothes on the floor
190	a cat sitting on top of a car	a cat sitting under a car
191	an artist sketched a portrait	an artist is sketching a portrait
192	A girl with stars in her eyes	A girl wearing star-shaped glasses
193	a rose in a glass vase	a person named Rose looking through a glass vase
194	a loud, booming thunder	a noisy, resounding thunder
195	a park with some people	a park with a lot of people
196	A woman curling her eyelashes in the bathroom	A woman filling in her eyebrows in the bathroom
197	A girl with a green thumb	A girl painting her thumb green
198	She is dancing in the rain	He is running in the park
199	A woman painting a beautiful landscape	A beautiful landscape painting on a wall
200	A sink full of dirty dishes	Dirty dishes piled on the counter near a sink
201	a large crowd gathered in the street	a big crowd assembled in the street
202	a flower vase on the left side of the table	a flower vase on the right side of the table
203	a girl happily playing with her dog	a girl reluctantly playing with her dog
204	A person weighing themselves in the bathroom	A person adjusting the shower temperature in the bathroom
205	A bicycle leaning against a tree	A bicycle chained to a tree
206	The leaves are falling from the trees	The snow is covering the ground
207	Children riding bicycles in the park	Bicycles parked near a playground
208	A girl jumping rope in the backyard	A jump rope lying on the grass
209	a sunset viewed from the beach	a sunrise viewed from the beach
210	a couple celebrated their anniversary	a couple is celebrating their anniversary
211	a gentle rain falling on the street	a light drizzle falling on the street
212	A bicycle leaning against a tree	A bicycle chained to a tree
213	a dog chasing a squirrel	a dog not chasing a squirrel
214	A musician passionately playing the piano	A musician frustrated with their piano performance
215	a cricket on the field	a cricket match on the field
216	A person reading a book under a tree	A book and a tree in a park
217	a tall glass of milk	a short glass of milk
218	a shelf with a few toys	a shelf packed with toys
219	a farmer harvested corn	a farmer is harvesting corn
220	The flowers bloom in the garden	The stars twinkle in the night sky
221	a bar of gold	a gold-colored metal bar
222	A bird perched on a branch	A bird flying away from a branch
223	A musician passionately playing the piano	A musician frustrated with their piano performance
224	a movie theater with a popcorn stand	a movie theater without a popcorn stand
225	a field with a few cows	a field filled with cows
226	A dog chasing its tail	A dog resting next to its toy
227	A person playing the violin in a concert hall	A person attending a concert in a concert hall
228	A chef sautéing vegetables on the stove	A chef tasting the soup in the kitchen
229	a cricket on the field	a cricket match on the field
230	a plane flying in the sky	a carpenter's plane in the sky
231	a lamp on the left side of the desk	a lamp on the right side of the des
232	A person reflecting on their personal growth	A person considering a new hairstyle
233	a peaceful walk through the wood	a solitary walk through the woods
234	A kitchen with a chef preparing a meal	A chef posing for a photo in a kitchen
235	A family enjoying breakfast together in the kitchen	A family playing a board game in the kitchen
236	People waiting in line at a bus stop	A bus stop with no people around
237	a close-up of a seal	close-up of a sealed envelope
238	a cat chased a mouse	a cat is chasing a mouse
239	a man finished painting a room	a man is painting a room
240	A man lost in his thoughts	A lost man looking for directions
241	an old man reminiscing about his past	an old man regretting his past
242	A kitchen with a chef preparing a meal	A chef posing for a photo in a kitchen
243	the violin was played by the musician	the musician was played by the violin
244	an artist sketched a portrait	an artist is sketching a portrait
245	the window was broken by the storm	the storm was broken by the window
246	a forest with a waterfall	a forest without a waterfall
247	A calm, tranquil forest scene	A forest fire creating chaos and destruction
248	a heavy wooden door	a light wooden door
249	An architect designing a building that represents unity	An architect drawing a blueprint for a house
250	a tall man wearing a hat	a short man wearing a hat
251	a cat sitting on top of a car	a cat sitting under a car
252	a bed with pillows at the head	a bed with pillows at the foot
253	a plate with some cookies	a plate overflowing with cookies
254	A cheerful dog wagging its tail	A frightened dog hiding under a table
255	a messy room with clothes on the floo	an untidy room with clothes on the floor
256	a house with a red door	a house without a red door
257	A person playing the violin in a concert hall	A person attending a concert in a concert hall
258	A person organizing their kitchen pantry	A person making a smoothie in the kitchen
259	an angry man yelling at someone	a furious man yelling at someone
260	a room filled with people	a room without people
261	bass swimming in the water	playing bass guitar by the water
262	a loud, booming thunder	a noisy, resounding thunder
263	a couple celebrated their anniversary	a couple is celebrating their anniversary
264	A cozy kitchen with a wooden floor	A wooden floor being installed in a kitchen
265	bass swimming in the water	playing bass guitar by the water
266	A musician composing a song about heartbreak	A musician tuning their instrument
267	a baby took her first steps	a baby is taking her first steps
268	A toilet with a colorful seat cover	Colorful seat covers for toilets displayed in a store
269	a clean white shirt	a dirty white shirt
270	a girl holding an umbrella in the rain	a girl not holding an umbrella in the rain
271	a cat lying inside a cardboard box	a cat lying outside a cardboard box
272	the book was read by the student	the student was read by the book
273	a serene mountain landscape	a treacherous mountain landscape
274	a farmer harvested corn	a farmer is harvesting corn
275	A couple is holding hands while walking	A teacher is writing on the blackboard
276	a tree with green leaves	a tree without green leaves
277	a tree with green leaves	a tree without green leaves
278	A person walking a dog on a leash	A dog running off-leash in a park
279	A woman shopping for groceries at a market	A woman selling produce at a market
280	a bicycle leaning against a wall	a bicycle hanging on a wall
281	A couple is holding hands while walking	A teacher is writing on the blackboard
282	A person pondering the meaning of life	A person thinking about their grocery list
283	People hiking up a mountain trail	A mountain trail with no people in sight
284	a bakery with a display case	a bakery without a display case
285	a car parked near the entrance	a car parked far from the entrance
286	a bakery with a display case	a bakery without a display case
287	A dog chasing its tail	A dog resting next to its toy
288	A chef adding a pinch of salt	A chef pinching a salt shake
289	A person plugging in a hairdryer in the bathroom	A person plugging in a curling iron in the bathroom
290	a noisy crowded street	a quiet crowded street
291	The flowers bloom in the garden	The stars twinkle in the night sky
292	A person arranging plates in a kitchen cupboard	A person arranging glasses in a kitchen cupboard
293	a couple enjoying a romantic dinner	a couple arguing during a romantic dinner
294	A man holding a camera while standing by a lake	A man taking a photo of his reflection in the lake
295	A lightbulb moment for an inventor	An inventor holding a glowing lightbulb
296	A person cleaning the oven in the kitchen	A person microwaving popcorn in the kitchen
297	a wide river	a narrow river
298	a couple enjoying a romantic dinner	a couple arguing during a romantic dinner
299	he sun rises over the city skyline	The rain pours down on the streets
300	a party with a handful of guests	a party with a large crowd of guests
301	A person playing fetch with their dog	A person walking their dog in the park
302	the cake was eaten by the child	the child was eaten by the cake
303	a tall man wearing a hat	a short man wearing a hat
304	a beach with seagulls	a beach without seagulls
305	a bookworm in a library	a book with a worm in a library
306	a warm and inviting bedroom	a cool and calming bedroom
307	a man taking a shot	a man taking a vaccine shot
308	a heavy wooden door	a light wooden door
309	A person mopping the kitchen floor	A person storing groceries in the kitchen
310	A cozy kitchen with a wooden floor	A wooden floor being installed in a kitchen
311	A fisherman casting a line into the ocean	A surfer riding a wave in the ocean
312	A family posing for a group photo	A family having a picnic in the park
313	A person arranging plates in a kitchen cupboard	A person arranging glasses in a kitchen cupboard
314	A person loading the dishwasher in the kitchen	A person making a sandwich in the kitchen
315	an angry man yelling at someone	a furious man yelling at someone
316	A baker decorating a cake	A baker serving a slice of cake
317	A person with a chip on their shoulder	A person with a potato chip on their shoulder
318	a busy city street with pedestrians	a busy city street without pedestrians
319	a room filled with people	a room without people
320	A person organizing their kitchen pantry	A person making a smoothie in the kitchen
321	A pizza with a slice removed	A pizza slice on a plate
322	A mother is cooking dinner for her family	A scientist is conducting an experiment
323	A proud artist showcasing their latest masterpiece	A frustrated artist struggling with their work
324	A scientist trying to understand the nature of consciousness	A scientist examining a microscope slid
325	a plate with some cookies	a plate overflowing with cookies
326	A philosopher contemplating the nature of reality	A person daydreaming about their vacation plans
327	the spider was scared of the human	the human was scared of the spider
328	A person is washing their car	An elephant is drinking from a river
329	a train with passengers	a train without passengers
330	A kitchen table set for dinner	A dinner party taking place in a kitchen
331	A couple tying the knot	A couple tying a knot in a rope
332	A scientist trying to understand the nature of consciousness	A scientist examining a microscope slid
333	a cat playing with a ball	a cat not playing with a ball
334	A person washing their hands in the kitchen sink	A person preparing a salad in the kitchen
335	a shelf with a few toys	a shelf packed with toys
336	A bowl of fruit on a kitchen counter	Fruits spread out on a kitchen counter
337	a clean, well-organized office	a tidy, well-arranged office
338	A baby giggling in their mother's arms	A baby crying in their mother's arms
339	A sink full of dirty dishes	Dirty dishes piled on the counter near a sink
340	a birthday cake with candles	a birthday cake without candles
341	A toilet with a colorful seat cover	Colorful seat covers for toilets displayed in a store
342	A man fixing a clogged toilet in the bathroom	A man taking a selfie in the bathroom
343	a basketball hoop above a garage	a basketball hoop next to a garage
344	A person hanging a towel on a bathroom rack	A person placing a bath mat in the bathroom
345	a bookshelf beside a window	a bookshelf in front of a window
346	A man shaving with an electric razor	A man shaving with a manual razor
347	a basketball hoop above a garage	a basketball hoop next to a garage
348	A woman sewing a dress	A dress and sewing supplies on a table
349	A clean sink in a restaurant	A restaurant with clean tables and a sink
350	a rose in a glass vase	a person named Rose looking through a glass vase
351	a zoo with elephants	a zoo without elephants
352	A mother is cooking dinner for her family	A scientist is conducting an experiment
353	the bird was fed by the child	the child was fed by the bird
354	A man watering the plants in his garden	A garden filled with plants and a watering can
355	A woman feeling under the weather	A woman standing below a weather vane
356	A bird perched on a branch	A bird flying away from a branch
357	a vase with a couple of flowers	a vase with a large bouquet
358	a spacious modern kitchen	an elegant modern kitchen
359	A person reflecting on their personal growth	A person considering a new hairstyle
360	a person standing in front of a painting	a person standing behind a painting
361	A child is swinging on a swing	A fish is swimming in the water
362	A person changing a lightbulb in the bathroom	A person hanging a shower curtain in the bathroom
363	A man holding a camera while standing by a lake	A man taking a photo of his reflection in the lake
364	A team of employees collaborating on a project	A team of employees arguing over a project
365	a dog fetched a stick	a dog is fetching a stick
366	a sky with a few clouds	a sky full of clouds
367	a bright room with sunlight	a dim room with sunlight
368	a forest with a few trees	a dense forest
369	a happy dog playing in the park	a joyful dog playing in the park
370	People hiking up a mountain trail	A mountain trail with no people in sight
371	A kitchen table set for dinner	A dinner party taking place in a kitchen
372	A joyful reunion of old friends	A tense meeting between old rivals
373	a girl has planted a tree	a girl is planting a tree
374	a park with some people	a park with a lot of people
375	he sun rises over the city skyline	The rain pours down on the streets
376	a cat lying inside a cardboard box	a cat lying outside a cardboard box
377	the book was read by the student	the student was read by the book
378	Children riding bicycles in the park	Bicycles parked near a playground
379	a peaceful walk through the wood	a solitary walk through the woods
380	A butterfly lands on a flower	A rocket launches into spac
381	a warm and inviting bedroom	a cool and calming bedroom
382	A man brewing coffee in the kitchen	A man making tea in the kitchen
383	Toilet paper rolls neatly stacked	A stack of books next to a toilet
384	a dog chasing a squirrel	a dog not chasing a squirrel
385	A mother teaching her child about kindness	A mother helping her child with homework
386	A man shaving with an electric razor	A man shaving with a manual razor
387	A calm, tranquil forest scene	A forest fire creating chaos and destruction
388	A happy family playing in the park	A family having a heated argument in the park
389	A family posing for a group photo	A family having a picnic in the park
390	A team of employees collaborating on a project	A team of employees arguing over a project
391	a ripe apple	an unripe apple
392	A modern bathroom with a glass shower	A glass filled with water in a bathroom
393	A person smiling while receiving a gift	A person disappointed by their received gift
394	A girl with stars in her eyes	A girl wearing star-shaped glasses
395	a ripe apple	an unripe apple
396	A person with a heart of gold	A person holding a golden heart-shaped object
397	A person with a heart of gold	A person holding a golden heart-shaped object
398	a large crowd gathered in the street	a big crowd assembled in the street
399	a girl holding an umbrella in the rain	a girl not holding an umbrella in the rain
400	a sky with a few clouds	a sky full of clouds
